# Supplementary material for: Understanding the response to endurance exercise using a systems biology approach: combining blood metabolomics, transcriptomics and miRNomics in horses
Source: BMC Genomics. 2017 Feb 17;18:187. doi: 10.1186/s12864-017-3571-3 (PMC5316211; doi:10.1186/s12864-017-3571-3)
Supplement: Additional file 14: — Expressed miRNAs. (XLSX 159 kb) [file 12864_2017_3571_MOESM14_ESM.xlsx]

## Sheet: miRNA_matched_metabolome.txt
Table S10. Expressed miRNAs in blood of horses following exercise
miRNA	X2_T0	X2_T1	X27_T0	X27_T1	X32_T0	X32_T1	X33_T0	X33_T1	X38_T0	X38_T1	X41_T0	X41_T1	X43_T0	X43_T1	X49_T0	X49_T1	X59_T0	X59_T1	X64_T0	X64_T1
eca-miR-106b	7.97625	7.75934	8.09617	8.28705	7.92313	7.64935	7.86853	7.80627	7.69202	8.02143	8.32423	8.01251	7.38997	7.9852	7.78622	8.10428	7.86236	7.88655	7.71249	7.82365
eca-miR-1180	6.5046	6.90717	6.30171	7.03112	6.43585	6.45953	6.48861	6.97362	6.09569	6.86683	6.35419	6.71384	6.11102	6.92892	6.8414	7.23306	6.74058	6.87297	6.48829	6.94988
eca-miR-1271a	7.94155	7.98895	7.74353	8.36222	8.15696	8.15464	8.09755	8.14997	6.98698	8.29586	8.18382	7.82817	7.60003	7.8652	7.95911	8.23687	8.30442	7.84901	7.87743	7.88824
eca-miR-1301	6.10108	6.00524	6.06734	5.96171	6.12147	5.78605	5.83232	5.72736	5.68646	5.83581	5.82269	5.78052	5.48465	5.89783	5.77747	6.01847	5.96889	5.84684	5.80795	5.90714
eca-miR-195	7.707	6.80437	7.03707	6.83418	7.30019	7.18605	7.49195	6.82935	6.87603	6.90141	7.4116	6.8021	7.62105	6.50304	7.83507	6.63501	7.40633	6.63168	7.18205	7.37811
eca-miR-193b	5.30018	5.64893	5.20834	5.41831	5.24768	5.3762	5.15234	5.43611	5.37964	5.30298	5.21749	5.45886	5.23065	5.40243	5.2063	5.43225	5.30816	5.32263	5.28294	5.24445
eca-mir-2887	5.60806	5.61479	5.56266	5.56508	5.88594	5.5684	5.66422	5.60318	5.28184	5.64078	5.61522	5.56846	5.47174	5.53099	5.62165	5.55546	5.6091	5.53986	5.64868	5.62557
eca-miR-296	5.57912	5.55735	5.83025	5.7283	5.63273	5.78321	5.66801	5.79765	5.40682	5.5951	5.70862	5.61864	5.72266	5.72007	5.74011	5.76173	5.79902	5.62639	5.82597	5.78652
eca-mir-3154	5.89066	5.68101	5.87667	5.7413	5.64567	5.80995	5.8576	5.74307	5.22708	5.74203	5.71602	5.72702	6.11553	5.63659	6.10877	5.66209	5.82613	5.80511	5.83446	5.88765
eca-miR-350	5.30946	5.30783	5.31108	5.41959	5.2841	5.37154	5.2609	5.38414	5.3612	5.39188	5.39779	5.34957	5.25015	5.45078	5.24949	5.48058	5.3014	5.39144	5.34411	5.30354
eca-miR-361-3p	6.85696	7.06688	6.93496	6.82024	7.30487	6.94668	6.88578	7.1379	6.72883	6.86607	7.28463	6.57589	6.57109	6.7322	6.71432	7.29236	7.20267	6.49077	7.11126	6.60901
eca-miR-425	5.58253	5.44521	5.45928	5.68799	5.52423	5.45602	5.64788	5.6154	5.34496	5.44983	5.66455	5.52463	5.30365	5.63252	5.5616	5.59084	5.60783	5.48124	5.46428	5.49821
eca-miR-451	7.29875	7.42725	6.91191	7.31706	7.15877	7.38674	7.17101	6.94673	6.84455	7.07653	7.41858	7.4402	6.53974	8.54244	6.81772	7.14155	7.23975	8.30594	6.56264	6.94192
hsa-let-7a-5p	11.165	11.0396	10.6203	11.8716	10.6071	10.2731	9.95527	10.7407	8.52773	11.2376	9.91126	11.461	8.85901	11.7963	10.4006	11.3073	10.178	11.2553	9.77107	11.5859
hsa-let-7b-5p	12.1066	11.6157	12.316	12.6734	12.0091	11.4515	11.209	12.3793	8.94624	11.7094	10.3653	12.6764	10.3353	13.5146	11.9733	11.9674	11.2514	12.988	10.6312	13.7074
hsa-let-7c	10.1086	9.76356	10.2041	10.6798	9.80742	9.74215	9.39446	10.2797	7.57556	9.9053	8.71743	10.7289	8.199	11.2792	9.53228	10.114	9.39666	10.8917	8.68952	11.5525
hsa-let-7d-3p	7.86771	7.7307	8.10919	7.3665	8.65546	7.49124	8.08175	7.58727	8.17859	7.73668	8.49135	7.413	8.01878	6.99624	7.52142	7.45948	8.20251	7.23946	8.50984	7.50874
hsa-let-7d-5p	10.1117	10.6815	9.80996	11.2733	9.95193	9.83012	9.63965	10.2255	7.89034	10.6266	9.49451	10.8466	8.30433	11.1339	9.55822	10.7929	9.77271	10.9535	8.62464	10.845
hsa-let-7f-5p	9.37013	9.582	8.93494	10.4083	9.00957	8.79921	8.44529	9.08568	7.18689	9.78637	8.26843	10.0462	6.99811	10.3117	8.45484	9.86662	8.70428	9.75222	7.97148	9.66268
hsa-let-7g-5p	8.01856	8.76685	8.43789	8.54562	7.72028	8.29078	7.3349	8.12162	6.09591	8.53497	7.11717	9.136	5.81573	9.50246	7.46419	8.98555	7.66588	9.09101	6.76755	8.13476
hsa-let-7i-5p	8.84589	9.51186	9.1594	10.3204	8.64354	9.44726	8.08988	9.45827	6.68549	9.20762	7.88479	9.70077	6.53772	10.5661	8.72725	10.2246	8.58455	10.0196	7.45047	9.57169
hsa-miR-101-3p	5.35534	5.49529	5.58523	5.84861	5.4063	5.58897	5.24137	5.71852	5.12187	5.67451	5.53529	5.66619	5.21197	7.0204	5.35583	5.69628	5.35002	6.07777	5.3169	5.63108
hsa-miR-103a-3p	8.34165	9.14752	7.53393	9.06563	8.48678	8.6127	8.20507	7.89771	6.46434	8.77667	7.33983	9.22422	6.09633	9.8858	7.51009	9.00668	7.50772	9.2576	6.58865	9.11338
hsa-miR-106b-3p	5.61163	5.42307	5.8222	5.88771	5.62002	5.57967	5.62716	5.63763	5.49394	5.74001	5.7185	5.64415	5.65071	5.74403	5.77956	5.71718	5.66902	5.72008	5.57389	5.71992
hsa-miR-106b-5p	6.75566	7.86548	7.77485	8.20113	7.05142	8.39846	6.56453	8.04049	6.11215	7.72293	7.44402	8.13893	6.51453	9.18107	6.85953	8.3905	6.78602	8.71413	6.75685	8.03181
hsa-miR-107	7.95861	8.78646	7.33549	8.70051	7.97825	8.22573	7.80439	7.41565	6.2366	8.59326	7.05419	9.05326	5.95958	9.43692	6.92382	8.66308	7.02539	8.973	6.42767	8.65649
hsa-miR-10a-5p	5.90969	6.41749	5.61184	6.11396	6.30955	6.23198	5.89197	6.06196	5.79115	5.8238	5.77342	5.97223	5.34851	6.48599	5.52665	6.37355	5.89822	6.11747	5.55068	5.76343
hsa-miR-1181	6.09013	5.75784	5.98835	5.90374	5.97996	6.04152	6.09587	5.93905	5.73412	5.84	5.87161	5.79324	6.8352	5.74766	7.11787	5.819	6.06385	5.85767	5.85646	6.22784
hsa-miR-1184	5.78362	5.62336	6.01421	5.84781	5.69359	5.87888	5.92253	5.85523	5.30871	5.72921	5.79245	5.82016	6.04998	5.72058	6.27911	5.69181	5.82578	5.79496	5.84677	5.9755
hsa-miR-1202	6.60852	6.16558	6.36755	6.21141	6.61944	6.30349	6.38031	6.19475	6.23762	6.10633	6.24492	6.0862	6.36775	6.08334	6.79003	6.1403	6.2278	6.17696	6.26414	6.34584
hsa-miR-1207-5p	6.68345	6.07327	6.27047	6.14662	6.37897	6.19685	6.19687	6.08093	6.87579	6.20794	6.2761	6.0368	6.4749	5.96289	6.58033	6.02375	6.07272	6.04987	6.11945	6.19383
hsa-miR-122-5p	5.30401	5.77132	5.23673	5.32334	5.21863	5.41478	5.25273	5.4524	5.18752	5.25898	5.25941	6.0429	5.26341	5.71028	5.24713	5.53343	5.26662	5.37535	5.23556	5.26778
hsa-miR-1224-5p	6.03117	5.63339	6.1514	5.97172	5.7548	5.98791	6.10658	5.99832	5.51947	5.90555	5.98709	5.92338	6.21826	5.72295	6.47876	5.78776	5.84999	5.8586	6.1879	6.20335
hsa-miR-1225-3p	5.6188	5.61384	5.64905	5.58435	5.72981	5.5944	5.64172	5.64273	5.31539	5.56214	5.6578	5.60187	5.52141	5.54966	5.6676	5.54909	5.68473	5.59161	5.66888	5.634
hsa-miR-1225-5p	8.14177	6.99965	7.92309	7.4838	7.52648	7.89945	8.07444	7.45005	7.3988	7.31846	7.81976	7.1529	8.86198	6.79881	8.52315	6.98924	7.79621	7.09028	7.50752	7.91127
hsa-miR-1228-3p	5.7666	5.92971	5.74714	5.68265	6.02238	5.69625	5.88991	5.75919	5.31182	5.75243	5.78161	5.70407	5.6872	5.64172	5.78159	5.71969	5.78252	5.65869	5.88097	5.79571
hsa-miR-1234-3p	5.78292	5.9288	5.72068	5.69101	5.96302	5.68943	5.83802	5.74731	5.26017	5.75917	5.79503	5.70745	5.64579	5.63419	5.72943	5.68773	5.74199	5.61627	5.74699	5.73456
hsa-miR-1238-3p	5.66929	5.77108	5.59271	5.63746	5.84367	5.59201	5.71402	5.67964	5.38538	5.66359	5.68733	5.63624	5.54325	5.57811	5.65991	5.69468	5.64504	5.5477	5.76283	5.68811
hsa-miR-1246	6.00538	6.52056	5.80033	6.38189	5.91778	6.63639	5.96098	6.38389	5.33337	5.99967	5.88032	6.31204	5.7134	6.84332	6.2222	6.44405	5.88641	6.2818	6.02702	6.35336
hsa-miR-1249-3p	5.76044	5.69228	6.23973	5.98853	6.14252	6.05888	5.92525	5.76226	5.3417	5.93007	5.88692	5.76941	5.7312	5.66303	6.09373	5.85181	6.25107	6.20609	5.9453	5.93103
hsa-miR-125a-3p	5.60837	5.39289	5.63262	5.53706	5.29497	5.53179	5.60042	5.61445	5.19472	5.47138	5.47903	5.48464	5.64066	5.41442	5.88158	5.40975	5.53793	5.45254	5.40009	5.61921
hsa-miR-125b-5p	5.35022	5.85314	5.66216	5.82779	5.47004	5.62128	5.70908	6.03534	5.34924	5.533	5.52512	5.68007	5.50056	5.97722	5.46405	5.8739	5.60368	5.74183	5.64471	5.67461
hsa-miR-1260a	7.43987	7.16563	7.6275	7.01622	7.46461	6.99985	7.52537	6.96776	8.06733	7.29237	8.18515	7.16236	7.59634	6.62256	7.00025	7.00837	7.42371	6.81192	8.18725	7.01678
hsa-miR-1260b	6.46264	6.19998	6.47519	6.14088	6.50682	6.15912	6.4767	6.16071	6.9406	6.34272	6.9619	6.21308	6.3109	5.91411	6.13635	6.19529	6.56802	6.20731	6.73264	6.12972
hsa-miR-1266-3p	8.35694	7.01938	7.4515	7.65577	7.27085	6.76547	8.43276	7.11212	7.14998	7.98976	7.45838	7.41629	7.98839	7.37362	8.18806	6.94355	8.37256	7.64552	7.07565	7.7459
hsa-miR-1268a	6.94997	6.54974	6.74365	6.62219	6.77357	6.63393	6.60582	6.4541	7.26161	6.42809	6.59584	6.52306	7.22624	6.28028	7.02188	6.40867	6.42382	6.43923	6.74319	6.88477
hsa-miR-1268b	6.26751	5.74066	5.86829	5.97656	5.9249	5.93583	5.74422	5.88064	6.78085	5.97745	5.86674	5.79724	6.06001	5.71843	5.93001	5.76863	5.80833	5.87472	5.89177	5.94453
hsa-miR-1273g-3p	8.91261	9.3097	8.48838	8.51606	8.99057	9.00743	9.12575	8.85613	9.19345	8.59312	8.70547	8.48645	8.28096	8.30914	8.29601	8.49035	8.7969	8.12056	9.18688	8.79482
hsa-miR-1275	6.32888	5.86203	6.4543	5.93768	6.23928	6.4989	6.34228	6.05865	5.5968	5.87944	6.13663	5.94628	6.56422	5.96867	6.56262	5.85453	6.27845	5.97676	6.33808	6.23547
hsa-miR-128-3p	10.1653	10.5476	9.67362	10.7445	10.5049	10.3851	10.2888	10.4399	9.56276	10.6022	10.8572	10.3169	9.58101	10.4312	9.7927	10.9523	10.6692	10.202	10.2861	10.2204
hsa-miR-1280_v18.0	5.8476	5.79923	5.90763	5.83006	5.85283	5.86833	5.91378	5.83071	6.29928	5.87346	6.06479	5.75132	5.80791	5.65885	5.84623	5.87338	5.89889	5.66109	6.16056	5.85975
hsa-miR-1281	5.65385	5.5027	5.64967	5.62522	5.68895	5.60682	5.68025	5.58109	5.58303	5.5569	5.72931	5.60433	5.51589	5.50232	5.57456	5.50853	5.61401	5.56308	5.65113	5.58736
hsa-miR-129-1-3p	6.0724	7.48392	5.91438	7.03028	6.36384	6.74742	6.08918	7.26984	5.88819	6.58674	6.38286	6.72594	5.55169	6.98675	5.67238	7.18815	6.31633	6.51957	6.31222	6.72297
hsa-miR-129-2-3p	5.6368	6.04849	5.44806	5.89295	5.68952	5.74026	5.57426	6.02379	5.54027	5.70835	5.71106	5.85248	5.31116	5.9055	5.42206	5.97035	5.67912	5.79572	5.59908	5.73051
hsa-miR-1290	5.4315	6.33005	5.45658	5.97205	5.41111	5.88257	5.47808	6.04546	5.1511	5.70278	5.41078	6.01269	5.43735	5.87391	5.56947	5.98268	5.3654	5.95341	5.37545	5.94936
hsa-miR-1296-3p	5.77541	5.9094	6.49353	6.10363	6.2013	6.26814	6.27593	6.49576	6.4174	6.04093	6.3772	6.01961	6.4415	6.02558	6.62032	6.36417	6.34214	5.95333	6.60612	6.19068
hsa-miR-1304-3p	5.63296	5.71726	5.53332	5.59241	5.77094	5.58448	5.67273	5.60439	5.30051	5.57128	5.61129	5.61396	5.54302	5.50682	5.64265	5.58633	5.61727	5.49084	5.61779	5.65137
hsa-miR-1306-3p	5.72101	5.52879	5.62874	5.62052	5.42553	5.50199	5.4627	5.60389	5.46681	5.48561	5.56677	5.55464	5.44607	5.71823	5.56766	5.5192	5.48141	5.72775	5.42189	5.68235
hsa-miR-1306-5p	9.30303	9.2198	9.67481	8.80166	9.47824	9.29608	9.34469	9.455	9.30053	9.64669	9.23537	8.5508	9.71591	8.0173	9.87504	9.12667	9.62384	8.96131	9.20468	9.23077
hsa-miR-1307-3p	5.68099	5.40055	5.64036	5.65376	5.40527	5.5684	5.50103	5.60837	5.56768	5.52134	5.51222	5.51197	5.39873	5.67369	5.58693	5.63104	5.46211	5.64799	5.44598	5.45896
hsa-miR-130b-3p	5.31971	5.36832	5.21059	5.51608	5.29041	5.30398	5.3633	5.40047	4.98618	5.32458	5.40498	5.56636	5.16639	5.66484	5.26521	5.44313	5.41487	5.76236	5.21664	5.36096
hsa-miR-133a-3p	5.24349	5.72821	5.17538	5.31367	5.16449	5.67245	5.22368	5.65745	5.18391	5.30717	5.23934	5.46162	5.27031	5.36835	5.27274	5.55201	5.28435	5.38738	5.25614	5.30236
hsa-miR-133b	5.18591	6.68462	5.20806	5.63107	5.3363	6.51146	5.17913	6.23828	5.32237	5.62144	5.22096	5.92053	5.20378	5.64431	5.21377	6.2848	5.18759	5.52345	5.33623	5.51466
hsa-miR-135a-3p	5.55586	5.44346	5.60442	5.52842	5.49943	5.76332	5.64098	5.58534	5.2444	5.41389	5.50664	5.49974	5.71207	5.47686	5.73407	5.4361	5.52036	5.45871	5.51336	5.62934
hsa-miR-138-5p	5.92985	5.94129	5.84544	5.78271	5.90272	5.71923	6.01554	5.82829	6.03678	5.87561	5.94062	5.78136	5.75179	5.74078	5.8771	5.83917	6.02941	5.77565	5.94554	5.75055
hsa-miR-140-3p	9.82071	10.474	10.0018	10.5676	10.0308	10.4059	9.97667	10.4615	10.0254	10.4838	10.2786	10.3539	10.2996	10.0857	10.1551	10.5967	10.0954	10.0091	10.3732	10.1567
hsa-miR-142-3p	6.09269	6.9346	6.18304	7.23515	7.09283	6.91304	5.92477	7.27266	7.86215	7.42525	7.35253	7.38199	5.83141	8.15725	5.69065	7.36643	6.0508	7.39771	6.83266	6.20453
hsa-miR-142-5p	5.59069	5.66099	5.87347	5.73366	5.93989	5.56435	5.5127	6.01773	5.33642	5.79609	5.86091	5.64507	5.39345	5.80799	5.50753	5.82884	5.59362	5.89122	5.71971	5.584
hsa-miR-144-3p	5.77841	5.99048	6.21011	6.17461	6.49395	6.10515	5.37905	7.02486	5.36199	6.82675	5.74617	6.3447	5.36601	7.27773	5.72705	6.43429	5.72061	7.06364	5.89711	5.92552
hsa-miR-144-5p	5.21083	5.36684	5.36086	5.73101	5.2091	5.3574	5.27065	5.43477	5.15224	5.45995	5.26154	5.64742	5.18397	6.06861	5.30374	5.51392	5.34012	5.96465	5.18371	5.46132
hsa-miR-145-5p	5.24981	5.69728	5.22337	5.69143	5.20598	5.98743	5.24694	5.59082	5.32473	5.30702	5.23768	5.50382	5.22319	5.2953	5.29623	5.48877	5.1974	6.24658	5.23243	5.41797
hsa-miR-148a-3p	5.56229	6.19902	5.65025	6.28377	5.64642	5.98614	5.52392	6.04651	5.18111	5.83314	5.77666	6.24453	5.33502	7.44182	5.59535	6.56746	5.60712	6.58683	5.39962	5.91221
hsa-miR-148b-3p	7.342	7.08101	7.38948	7.63678	7.3776	7.05344	6.87375	7.27683	6.94137	7.74356	7.47212	7.33395	6.26162	7.86503	7.07857	7.64288	7.39325	7.50766	6.96403	7.05892
hsa-miR-150-5p	13.3077	11.7902	11.8944	11.1611	13.2503	11.1246	13.3213	11.481	12.563	12.2238	11.9039	11.7048	12.6205	11.4832	12.2679	11.0931	13.0817	11.2631	11.4885	11.5201
hsa-miR-151a-3p	6.01141	6.59564	5.93188	6.53376	6.39705	6.35493	6.21466	6.45784	5.89722	6.36679	6.30003	6.21763	5.78622	6.7173	5.82245	6.75395	6.29076	6.3651	6.07355	6.06271
hsa-miR-151a-5p	6.60697	7.19083	6.66159	6.93328	6.81062	7.37298	6.58712	7.18629	6.59364	6.92384	6.51073	6.79993	6.318	7.55994	6.30415	7.53641	6.60767	6.95013	6.53737	6.71111
hsa-miR-151b	6.05145	6.59618	6.0872	6.22409	6.17738	6.50209	6.03146	6.41614	5.71499	6.15543	6.06313	6.20329	5.74439	6.71736	5.80028	6.60599	6.09885	6.35364	5.92729	6.01169
hsa-miR-155-5p	6.07338	6.0999	5.73854	6.18194	5.92497	5.65476	5.94095	5.85219	5.21027	5.83273	5.6807	5.7268	5.40912	6.2668	5.99283	6.10485	6.2688	6.16265	5.3873	5.86292
hsa-miR-1587	6.36983	5.85498	6.07096	6.11103	6.1504	6.38314	6.24187	5.99364	6.42764	6.14546	6.0924	5.97765	6.60517	5.92382	6.41684	5.88899	6.06185	6.13811	6.00861	6.31545
hsa-miR-15a-5p	8.31463	9.05745	8.08636	9.70475	8.6839	8.94702	7.83783	8.96046	6.25347	8.74572	8.19349	9.56679	6.40791	10.576	8.0065	9.46435	8.29113	10.2615	6.97823	9.54102
hsa-miR-15b-3p	5.57362	5.81789	5.27534	5.66204	5.62425	5.62546	5.57167	5.59967	5.3526	5.55918	5.64807	5.52398	5.32633	5.62498	5.41814	5.85818	5.70416	5.66728	5.42931	5.51745
hsa-miR-15b-5p	15.2194	14.3461	15.3666	16.1099	15.2992	13.8974	15.0439	14.5953	14.7113	15.6003	15.3988	15.0648	14.051	15.5761	14.9777	15.123	15.4191	15.0934	14.2633	15.0894
hsa-miR-16-5p	11.6887	12.1877	10.9694	13.4327	11.5838	11.9731	11.1203	11.888	10.3258	12.2421	11.5815	13.0627	9.97091	14.712	11.5497	12.4933	11.6816	13.4455	10.3353	12.4715
hsa-miR-17-3p	5.2788	5.37173	5.27757	5.49926	5.31053	5.33746	5.21437	5.34327	5.19193	5.34368	5.2662	5.42288	5.23531	5.74303	5.32686	5.40607	5.33452	5.53947	5.30834	5.2877
hsa-miR-17-5p	6.39108	7.11517	6.95761	7.77396	6.61345	7.59604	6.23624	7.33315	5.32801	7.19599	6.42349	7.65011	5.67147	8.77728	6.85439	7.96686	6.45338	8.10693	5.85963	7.42389
hsa-miR-181a-2-3p	5.38615	5.37399	5.3493	5.52914	5.41474	5.40566	5.36068	5.49423	5.44371	5.48659	5.32219	5.36639	5.22556	5.49162	5.28547	5.47096	5.44147	5.4382	5.4398	5.36831
hsa-miR-181a-5p	6.8697	6.95677	8.01225	7.67624	6.82584	7.59108	6.40455	7.82711	5.96797	7.14017	6.42601	7.48972	7.01746	7.82069	7.895	7.7345	7.01458	7.78798	7.02902	7.92579
hsa-miR-181b-5p	6.08515	5.89434	6.01226	6.07604	5.8213	5.88882	5.68672	6.01231	6.23074	5.84748	5.72515	5.92642	5.74971	6.2354	5.97948	6.21124	5.77476	6.19357	5.77332	6.02235
hsa-miR-181d-3p	5.98199	5.3689	5.62786	5.72837	5.44794	5.61206	5.4409	5.58638	6.22844	5.65156	5.48064	5.47465	5.53094	5.4579	5.59361	5.57896	5.48087	5.62576	5.50909	5.53945
hsa-miR-1825	5.58762	5.53566	5.61963	5.57391	5.60638	5.53382	5.67381	5.66524	5.69069	5.54781	5.66811	5.61718	5.52366	5.49887	5.59576	5.54497	5.56963	5.53523	5.60287	5.62535
hsa-miR-185-5p	9.34174	10.2304	9.67611	10.62	9.77707	10.3698	9.44851	10.0382	8.55843	10.0257	10.1741	10.2417	9.46994	10.5464	9.23697	10.6008	9.41939	10.4942	9.48945	10.0508
hsa-miR-186-5p	8.40264	9.33068	8.32327	9.26578	8.92473	9.574	8.55549	9.05127	8.55492	8.97765	9.43732	9.15731	8.46049	9.85947	8.23084	9.5263	8.5969	9.05344	8.72333	8.53813
hsa-miR-188-5p	6.00147	5.54142	5.90528	5.85093	5.68953	5.93927	5.88037	5.82513	5.4547	5.74478	5.89768	5.77464	6.08201	5.71285	6.35751	5.7084	5.81969	5.84274	5.87614	5.96838
hsa-miR-18a-3p	5.79436	5.82428	5.95567	6.04508	5.71162	5.86593	5.77192	5.93554	5.52923	5.90525	5.76408	5.83521	5.78508	5.83468	6.02252	5.8848	6.15559	5.90919	5.73017	5.76098
hsa-miR-18a-5p	5.17274	5.4379	5.39266	5.60569	5.3222	5.51669	5.2144	5.52411	5.06349	5.34744	5.16731	5.53749	5.25587	6.16897	5.17631	5.6288	5.20501	5.83639	5.20588	5.43519
hsa-miR-18b-5p	5.16482	5.45875	5.32516	5.42296	5.24673	5.3925	5.17165	5.32095	5.16075	5.27408	5.30515	5.36953	5.28514	5.70407	5.27909	5.45158	5.28974	5.48153	5.26072	5.43429
hsa-miR-191-3p	5.64063	5.5939	5.54782	5.56953	5.71988	5.53643	5.63338	5.60731	5.25869	5.61464	5.62281	5.58829	5.509	5.53591	5.61074	5.53768	5.63211	5.51397	5.59585	5.66227
hsa-miR-191-5p	6.52712	6.41116	6.0611	6.82864	6.20562	6.48345	6.84759	6.81028	5.27616	6.63849	6.20349	6.48295	6.31076	6.60101	6.77423	6.729	6.71554	6.49909	5.96635	6.76448
hsa-miR-1915-3p	6.45745	5.83317	6.14175	5.9194	6.20833	5.93808	6.13377	5.9368	6.26205	5.91204	6.08312	5.78413	6.05757	5.73774	6.9084	5.82536	6.11031	5.83046	6.16603	6.00253
hsa-miR-192-5p	5.36283	5.53474	5.40093	5.66661	5.61753	5.62963	5.42473	5.56679	5.30683	5.38984	5.59076	5.63262	5.27566	5.88467	5.47113	6.09423	5.59111	5.75307	5.34783	5.441
hsa-miR-194-5p	5.41564	5.73033	5.43705	5.70851	5.67025	5.83794	5.51196	5.72727	5.24413	5.44994	5.65849	5.66463	5.40181	5.9946	5.56474	6.12012	5.69934	5.86841	5.31211	5.54746
hsa-miR-195-5p	5.35315	5.5769	5.3729	5.62938	5.29525	5.45988	5.26986	5.46215	5.18852	5.42757	5.48453	5.62926	5.25005	5.88917	5.33701	5.56383	5.30705	5.67697	5.20516	5.5255
hsa-miR-196b-5p	6.57063	6.73735	5.93127	7.27144	6.37136	6.23288	6.05934	6.5952	5.51657	6.71678	5.83015	6.6969	5.3813	7.66006	6.01822	7.08462	6.15823	6.99608	5.60882	6.69574
hsa-miR-197-3p	11.6429	11.4334	12.6194	11.5766	12.601	11.593	11.7066	11.6098	12.2886	12.1544	12.3708	11.6781	12.6439	10.7543	12.7548	11.3528	12.2876	11.6271	12.7224	12.1727
hsa-miR-197-5p	8.48881	8.51502	8.56354	8.43799	7.82071	8.5322	8.60837	8.73836	7.65417	8.56084	8.48268	8.58218	9.62637	8.06793	9.51497	8.12667	8.44454	8.06766	7.8424	8.9609
hsa-miR-1973	5.76209	5.25229	5.54136	5.64642	5.35314	5.51157	5.73548	5.47896	5.06759	5.59556	5.38073	5.55166	5.50184	5.62825	5.93452	5.34063	5.72859	5.60403	5.36955	5.67101
hsa-miR-19a-3p	5.485	5.43554	5.7181	5.71307	5.80191	5.53029	5.51599	5.73204	5.33277	5.67356	5.91995	5.68715	5.33747	6.90263	5.4219	5.74496	5.53743	6.12504	5.71994	5.49914
hsa-miR-19b-3p	6.52413	6.89644	6.88845	7.00067	7.25498	7.03395	6.63241	7.0398	7.34216	6.68281	7.7581	6.924	6.53694	8.63985	6.26611	7.43341	6.77681	7.85548	7.24142	6.43216
hsa-miR-205-5p	5.27041	6.43053	5.28124	6.28377	5.24818	5.92718	5.20325	5.60783	5.26718	5.69444	5.24092	6.17814	5.24452	6.06733	5.17644	5.91755	5.31479	5.55173	5.20336	5.59773
hsa-miR-20a-5p	6.22338	7.41406	6.63009	8.1566	6.49666	7.97978	5.94996	7.62079	5.43037	7.32663	6.10259	8.16419	5.51295	9.69515	6.40932	8.37799	6.18043	8.69062	5.78746	7.75575
hsa-miR-20b-5p	5.63147	6.2419	5.81555	6.72846	5.47549	6.58438	5.41032	6.2252	5.27469	6.09199	5.51375	6.55769	5.36523	7.63216	5.56728	6.67828	5.54591	7.11697	5.31464	6.29141
hsa-miR-21-5p	5.94177	6.63398	5.91401	7.08471	6.34555	6.80049	5.82767	6.48926	5.77852	6.43735	6.26358	6.94173	5.48472	8.65256	5.7314	7.0181	5.94455	7.67415	5.76911	6.52019
hsa-miR-215-3p	5.28826	5.48829	5.28016	5.5619	5.4122	5.61552	5.39369	5.49886	5.2804	5.30467	5.56333	5.60347	5.24671	5.79538	5.42516	5.92925	5.46595	5.71993	5.31895	5.41664
hsa-miR-22-3p	8.26341	8.93966	7.27324	8.37953	8.5644	8.79375	7.78411	8.07903	7.64998	7.89691	8.28368	8.32395	6.58659	9.12139	7.6746	8.57172	8.45241	8.93706	7.12201	7.9097
hsa-miR-221-3p	5.548	5.65527	5.49028	5.7419	5.4822	5.57697	5.3725	5.65919	5.27359	5.52507	5.59498	5.68525	5.23515	5.97058	5.48116	5.70031	5.55827	6.03665	5.3463	5.64782
hsa-miR-222-3p	5.46177	5.36154	5.40236	5.52125	5.30983	5.43431	5.34747	5.31352	5.25783	5.36933	5.47175	5.40569	5.29086	5.52309	5.3978	5.46426	5.46513	5.54301	5.30499	5.36311
hsa-miR-223-3p	12.6682	13.7853	11.3691	13.9165	12.7594	13.2767	12.1832	13.848	11.6989	12.9785	13.2168	13.3988	11.4071	14.1264	12.1021	14.4463	12.691	13.1762	12.1754	12.6799
hsa-miR-2276-3p	5.73991	5.46995	5.62595	5.60742	5.75873	5.57224	5.61363	5.63085	5.35091	5.53491	5.69241	5.58285	5.47465	5.49836	5.7696	5.60633	5.5526	5.5173	5.48943	5.62614
hsa-miR-2392	5.87745	5.55495	5.8836	5.73212	5.81179	5.77733	5.69341	5.66419	5.33947	5.69139	5.74598	5.76758	5.58817	5.62178	5.78475	5.5162	5.6895	5.67647	5.68301	5.82576
hsa-miR-23a-3p	9.59445	10.3594	8.58672	10.1773	9.89777	9.96941	9.56212	9.72714	8.62862	9.7837	10.1742	9.94789	8.93719	10.2224	8.80033	10.6195	9.83346	9.84138	9.1459	9.28303
hsa-miR-23b-3p	8.48642	8.61418	7.49779	8.61898	8.87688	8.15257	8.54818	8.26726	7.46884	8.07163	8.98564	8.59057	7.64176	8.5248	7.99326	9.02398	8.56002	8.2119	7.63021	8.12588
hsa-miR-24-3p	6.25052	6.96048	5.94146	6.09369	6.6337	6.31896	6.39953	6.16242	5.45814	6.04707	6.38925	6.32433	5.61337	7.00117	5.69385	6.58672	5.95684	6.66642	5.94626	6.04804
hsa-miR-25-3p	14.1838	13.5325	14.1797	15.2487	14.7271	13.6394	14.2764	14.0503	13.843	14.1897	14.4737	14.3206	13.6078	14.9948	14.1159	14.8719	14.4972	14.3253	13.8297	14.1448
hsa-miR-25-5p	5.27751	5.22978	5.28089	5.30319	5.39513	5.30602	5.33247	5.27517	5.0185	5.27932	5.27758	5.36072	5.09628	5.38703	5.12917	5.29754	5.22502	5.31887	5.16941	5.33908
hsa-miR-26a-5p	8.75367	8.40524	8.16783	9.05792	8.68998	8.32834	9.00981	8.69536	7.50777	8.14824	8.51462	8.0108	7.89745	9.10283	8.41816	8.73156	8.86357	8.45525	7.58846	8.34616
hsa-miR-26b-3p	5.25496	5.29293	5.27889	5.29544	5.20584	5.21961	5.33108	5.28762	5.34811	5.2599	5.28642	5.24336	5.25477	5.29063	5.2814	5.26516	5.30442	5.31098	5.20162	5.22963
hsa-miR-26b-5p	6.7792	7.24236	6.1992	7.86484	6.6292	6.66199	6.3492	6.98093	5.55026	7.22987	6.47331	7.36245	5.51632	8.87428	6.24384	7.83397	6.66019	7.45748	5.94487	7.05707
hsa-miR-27a-3p	5.79488	6.25097	5.72398	5.97878	5.72286	6.01815	5.70707	6.09751	5.56539	5.83798	5.98885	6.03213	5.45392	6.58401	5.54604	6.31323	5.74915	6.12032	5.75887	5.75752
hsa-miR-27b-3p	6.1519	6.45102	5.93076	6.67375	6.17032	6.12523	6.03571	6.23796	5.68426	6.23319	6.54534	6.58766	5.53728	7.29847	5.92825	6.66517	6.2073	6.45049	5.85278	6.20529
hsa-miR-28-5p	5.36883	5.48638	5.30678	5.5133	5.4331	5.38307	5.4133	5.51508	5.18415	5.28559	5.37031	5.40816	5.27036	5.61207	5.32287	5.62166	5.41916	5.5521	5.2458	5.40905
hsa-miR-2861	5.88711	5.43899	5.52459	5.6639	5.56297	5.67618	5.41973	5.5012	5.88094	5.58557	5.52975	5.51425	5.66447	5.44605	5.64029	5.45272	5.46879	5.52768	5.48308	5.66489
hsa-miR-29a-3p	7.09587	6.93188	6.37241	7.09211	6.74907	6.47164	7.09976	7.08529	6.51086	6.8328	7.44227	7.30366	6.15824	7.71001	6.52606	7.14039	6.92814	6.82444	6.47358	6.82807
hsa-miR-29b-3p	5.33488	5.47709	5.42316	5.44951	5.31323	5.39356	5.29401	5.5143	5.30331	5.33318	5.40591	5.48716	5.26993	5.99767	5.26528	5.41832	5.34022	5.62792	5.30179	5.36684
hsa-miR-29c-3p	5.77916	5.90447	5.79794	6.07202	5.71523	5.76318	5.71814	6.05305	5.35573	5.72633	5.89067	5.95607	5.34281	7.73939	5.55845	5.81259	5.63233	6.21991	5.54422	5.65419
hsa-miR-29c-5p	5.96548	6.49845	5.94307	6.10005	5.96115	6.06639	6.06783	6.32493	6.3569	5.92559	6.06217	5.9746	5.63268	6.54514	5.64398	6.19333	5.94305	5.89357	6.10864	5.71935
hsa-miR-30a-5p	5.38503	5.38706	5.29162	5.4793	5.37062	5.43814	5.36911	5.33237	5.26707	5.29556	5.32231	5.31577	5.2512	5.51327	5.34715	5.48009	5.38595	5.45456	5.40632	5.25027
hsa-miR-30b-5p	7.81325	8.77728	7.58384	8.44063	8.20567	8.91874	7.94492	8.28811	7.28264	8.11764	8.33872	8.35808	7.60395	8.87498	7.49186	8.52857	8.14236	8.38611	7.45484	7.94348
hsa-miR-30c-1-3p	5.36715	5.4081	5.22532	5.37068	5.30264	5.23358	5.31496	5.33971	5.13379	5.31935	5.31854	5.3242	5.26171	5.36235	5.2865	5.29382	5.28839	5.31602	5.2107	5.32689
hsa-miR-30c-5p	10.35	10.0481	9.01854	10.2527	10.6215	10.6025	10.1363	9.91243	8.21983	10.0547	9.77666	9.80216	9.14421	9.75836	10.1267	10.3295	10.0534	9.90172	8.99376	10.0264
hsa-miR-30d-5p	7.03406	7.43534	6.80004	7.44102	7.11795	7.58613	6.93775	7.66908	6.85311	6.92659	7.16985	6.96755	6.64143	7.47143	7.0969	7.68529	7.17428	6.90894	6.97453	6.83488
hsa-miR-30e-3p	5.7363	6.02408	5.60006	5.89778	5.89892	5.74057	5.71283	5.76178	5.31054	5.78501	5.84856	5.78079	5.40833	6.02683	5.56366	6.25811	5.83794	5.85904	5.64973	5.6997
hsa-miR-30e-5p	6.15186	6.61198	6.45493	6.83823	6.63414	7.18072	6.11003	6.90401	6.31201	6.45108	6.52108	6.70267	5.79401	7.75272	6.26472	7.16203	6.29027	6.97983	6.52529	6.49849
hsa-miR-3135b	5.58431	5.44042	5.67965	5.62276	5.58133	5.57666	5.49209	5.39705	5.22036	5.56688	5.71402	5.68495	5.37729	5.41655	5.4665	5.49421	5.61273	5.87475	5.2934	5.48842
hsa-miR-3141	5.83718	5.83971	6.62434	6.4001	5.85894	6.04027	5.89293	6.01977	5.42118	5.85842	6.45972	6.49886	5.8359	6.01538	5.82949	5.91557	5.66605	6.17971	5.90146	6.25159
hsa-miR-3156-5p	5.39982	5.43605	5.45758	5.58586	5.32923	5.5502	5.39149	5.49958	5.1255	5.48376	5.49557	5.55739	5.43063	5.55021	5.48932	5.31833	5.46648	5.51087	5.25154	5.60342
hsa-miR-3159	5.69094	5.42801	5.70168	5.65456	5.41959	5.83548	5.69389	5.69334	5.22843	5.59537	5.54707	5.58165	6.11546	5.57508	6.40079	5.50802	5.66032	5.67199	5.46786	5.85127
hsa-miR-3162-3p	5.68824	5.75228	5.6746	5.62113	5.73934	5.59673	5.695	5.6488	5.46653	5.66712	5.70493	5.62025	5.54349	5.55851	5.64552	5.69383	5.63685	5.54885	5.78782	5.68019
hsa-miR-3162-5p	8.16642	7.26993	8.53426	7.85722	7.7277	8.01807	8.34824	7.88006	7.4818	7.88993	8.11895	7.71244	9.10869	7.26073	8.68198	7.31293	8.08711	7.29837	8.1559	8.31527
hsa-miR-3195	5.98532	5.79093	7.87697	6.99176	6.11789	5.91074	5.81643	5.84554	5.73652	5.76093	7.10754	6.59173	5.69408	5.71559	5.91798	5.82067	5.69571	5.69378	6.31064	6.01908
hsa-miR-3200-3p	6.31499	6.40714	6.85691	6.67723	6.79343	6.5359	6.30274	6.62702	6.79823	6.60214	6.95551	6.33171	6.32898	6.48427	6.64473	6.83656	6.8753	6.6264	7.08276	6.33635
hsa-miR-3202	9.33422	9.30321	9.5954	9.49489	8.90739	9.10019	9.28074	9.39575	8.00947	9.09662	9.33673	9.31998	9.91481	9.27363	10.0326	9.15493	9.33182	9.4326	8.78065	9.86875
hsa-miR-320a	9.61855	9.78155	9.84172	9.62855	9.45566	9.19692	9.54312	9.56984	8.39675	9.45219	9.74748	9.53953	9.78348	9.72498	9.72125	9.45304	9.53953	9.67436	9.58592	10.051
hsa-miR-320b	9.00886	8.82908	9.07998	8.99522	8.74374	8.48217	8.93062	8.80018	8.01486	8.72238	9.25794	8.98512	8.73325	8.94028	8.74562	8.74572	8.95792	9.03269	8.62544	9.21668
hsa-miR-320d	9.72916	9.96306	9.89658	9.73904	9.76492	9.28599	9.73338	9.59214	8.63177	9.62125	9.96631	9.66778	9.52201	9.8523	9.46648	9.62776	9.70823	9.81929	9.72256	9.98227
hsa-miR-320e	9.51501	9.64382	9.56438	9.39583	9.42961	8.91318	9.43605	9.34937	8.39627	9.34425	9.67558	9.42387	9.12529	9.35192	9.08159	9.29619	9.40391	9.4636	9.23312	9.62223
hsa-miR-324-3p	10.0221	9.7628	10.3975	9.8265	10.1347	9.71702	9.87481	9.91689	10.5004	9.90742	10.7002	9.82247	10.5084	9.43546	10.0729	9.7745	10.276	9.55944	10.7187	9.80318
hsa-miR-324-5p	5.94766	6.6788	6.61221	6.57717	6.29327	7.07376	6.00471	6.86077	6.75212	6.61297	6.47473	6.64293	5.92537	6.67528	5.9095	6.83311	6.32387	6.83284	6.61972	6.24068
hsa-miR-326	6.79922	7.03002	6.84678	6.68979	6.91531	6.69002	6.57672	6.80738	6.77126	6.91271	6.95317	6.62806	6.42822	6.43355	6.3965	6.81743	6.97998	6.51236	6.96531	6.36345
hsa-miR-328-3p	7.03042	6.94495	7.25723	6.7256	7.71928	7.07404	7.06772	6.90356	7.53387	7.02476	7.52192	6.65437	6.82046	6.47719	6.58299	6.66318	7.21901	6.54237	7.66802	6.8886
hsa-miR-330-3p	5.54139	5.56526	5.50982	5.61442	5.59728	5.49346	5.55413	5.65444	5.18095	5.46035	5.55895	5.56037	5.32464	5.61938	5.35474	5.65319	5.59256	5.52375	5.35997	5.4785
hsa-miR-331-3p	10.1393	10.5633	11.1666	10.2169	10.8665	10.7384	10.1742	10.4656	11.2465	9.95125	10.7705	9.88556	11.0074	9.56645	9.82744	10.3774	11.0928	9.8833	11.4294	9.66379
hsa-miR-339-5p	5.33557	5.38164	5.41745	5.44549	5.23191	5.42999	5.25249	5.55949	4.99014	5.27871	5.36989	5.25749	5.48093	5.42319	5.44977	5.48951	5.36367	5.31666	5.40802	5.39474
hsa-miR-33b-3p	5.83213	5.36344	5.81021	5.94993	5.22303	5.97665	5.79895	5.6483	7.22338	6.04671	6.12636	5.66698	5.59884	5.55078	5.55116	5.77182	5.81828	5.72894	6.311	5.65939
hsa-miR-340-3p	5.64128	6.22136	5.60021	5.91241	5.78712	5.93321	5.57643	5.93499	5.75031	5.84383	5.83104	5.90711	5.4322	6.14518	5.53197	6.27318	5.80631	5.90246	5.83291	5.70144
hsa-miR-342-3p	9.5616	9.43488	8.65278	8.78477	9.60734	8.92187	9.90463	9.45889	8.19838	9.34095	9.15083	8.75788	9.13259	8.84029	9.54612	9.12393	10.0282	9.27078	8.67084	9.12289
hsa-miR-342-5p	5.99325	5.99288	5.69867	5.67663	6.04294	5.55665	6.14011	5.76673	5.53263	5.70071	5.83876	5.71346	5.50096	5.78287	5.60895	5.80362	6.17007	5.89088	5.55224	5.71058
hsa-miR-361-3p	5.50141	5.66157	5.58516	5.58725	5.66321	5.51734	5.51744	5.63209	5.58354	5.60109	5.60824	5.52598	5.33532	5.6118	5.52361	5.77539	5.56396	5.48752	5.70801	5.51003
hsa-miR-361-5p	8.38309	9.19137	8.49879	8.96626	8.77232	9.17227	8.57478	9.01384	8.03284	8.56996	9.01381	8.50227	8.64566	8.81762	8.47823	9.40568	9.07454	8.78891	8.60297	8.55275
hsa-miR-3614-5p	6.00728	5.8793	6.11402	5.95725	6.32295	6.01861	6.0496	5.94832	6.00868	5.99271	6.2503	5.97437	5.68681	5.88471	6.0844	5.97658	6.30653	5.90154	6.16448	6.01382
hsa-miR-362-5p	5.38411	5.41904	5.49707	5.63356	5.34122	5.34865	5.26106	5.42042	5.12416	5.35208	5.44378	5.46439	5.29878	5.68184	5.35519	5.65838	5.4291	5.58763	5.29465	5.3486
hsa-miR-3653-3p	6.92033	7.4168	6.52506	6.55234	6.42183	7.15535	7.12379	7.15334	5.85231	6.92391	6.31302	7.15274	6.85878	6.88309	7.39457	7.56486	7.34478	6.9623	6.53155	6.89109
hsa-miR-3656	6.87084	6.00599	6.3208	6.2821	6.50664	6.51034	6.1469	6.28997	7.19431	6.29737	6.30019	6.14751	6.49703	6.01511	6.75667	6.23774	6.22928	6.21012	6.49121	6.60691
hsa-miR-365a-3p	5.67708	6.73453	5.56712	5.82221	5.632	5.76217	5.52685	6.01422	5.51855	5.66637	5.50882	5.9733	5.34373	5.72554	5.54815	6.01577	5.68825	5.75268	5.4948	5.57879
hsa-miR-3665	6.01476	5.47786	5.76189	5.73267	5.73968	5.76285	5.7742	5.70267	5.28823	5.5983	5.70578	5.5503	5.69706	5.5101	6.20584	5.56845	5.66655	5.58753	5.6215	5.75841
hsa-miR-3676-5p	5.48069	5.50756	5.61058	5.61593	5.42402	5.59236	5.42548	5.64764	5.20993	5.36613	5.5867	5.56499	5.34534	5.56158	5.48765	5.57425	5.47016	5.46451	5.44493	5.49143
hsa-miR-3679-5p	6.20584	6.00978	6.41067	6.26691	6.04938	6.47892	6.21328	6.21456	5.87382	6.11815	6.26295	6.19747	6.57229	6.06367	6.44288	6.10021	6.10321	6.26583	6.12157	6.46929
hsa-miR-371a-5p	5.54134	5.43224	5.57971	5.57439	5.51654	5.59278	5.41756	5.46145	5.27847	5.50544	5.63832	5.44893	5.47375	5.45964	5.47336	5.57024	5.41509	5.49586	5.51446	5.54298
hsa-miR-374a-5p	5.44635	5.36718	5.48846	5.92339	5.54092	5.50447	5.42174	5.53337	5.25614	5.63038	5.61031	5.7232	5.31225	7.24159	5.49053	5.66919	5.51315	6.01217	5.42789	5.64794
hsa-miR-374b-5p	5.34859	5.49793	5.30828	5.78687	5.35028	5.47753	5.29342	5.49221	5.25401	5.26712	5.42273	5.57243	5.19321	6.28403	5.45338	5.6654	5.54489	5.91508	5.26	5.49098
hsa-miR-378a-3p	5.99154	5.92765	5.79154	5.79967	5.80827	5.80052	5.89194	5.82754	5.24679	5.73897	5.721	5.74268	5.65792	5.84373	6.14597	6.08553	5.99757	6.10069	5.69418	5.76051
hsa-miR-378i	5.65768	5.49158	5.52548	5.55056	5.47446	5.55088	5.47986	5.50008	5.15386	5.48753	5.52111	5.55899	5.40431	5.55035	5.72628	5.61693	5.62491	5.73912	5.36663	5.52549
hsa-miR-3911	5.47954	5.4876	5.74992	5.70131	5.46405	5.69566	5.56756	5.63485	5.25317	5.45972	5.66383	5.69107	5.5316	5.62004	5.48175	5.56349	5.46425	5.74589	5.34664	5.76482
hsa-miR-3940-5p	5.4983	5.33853	5.57209	5.4798	5.44799	5.45418	5.43414	5.48506	5.3116	5.37652	5.4812	5.43726	5.39167	5.4283	5.49527	5.41655	5.355	5.44875	5.40827	5.48618
hsa-miR-3960	9.88834	8.32696	9.35708	8.395	10.0288	8.9814	9.63985	8.77401	9.30977	9.00924	9.17541	8.40833	9.91437	7.73274	10.1664	8.29593	9.16097	8.28177	9.35718	8.75617
hsa-miR-423-3p	8.80901	8.55641	9.49316	8.73774	8.70932	9.13717	9.03321	9.28847	9.2732	8.77861	9.23159	8.45913	10.0056	8.04384	9.33355	8.73521	9.25031	8.41559	9.28706	8.6253
hsa-miR-423-5p	10.3087	10.0694	10.821	10.2125	9.92553	10.3737	11.0712	10.8185	10.1088	10.4427	10.165	10.2637	10.982	9.83275	10.6534	10.0086	10.5211	10.2101	10.3954	10.4662
hsa-miR-424-3p	5.41613	5.41588	5.49911	5.38235	5.34866	5.63813	5.55998	5.48427	5.13437	5.47345	5.36731	5.45657	5.36975	5.48582	5.47336	5.3444	5.45359	5.38306	5.52704	5.42255
hsa-miR-425-3p	5.61923	5.58862	5.58959	5.59886	5.70271	5.53715	5.67027	5.60238	5.33663	5.57421	5.60475	5.53018	5.51189	5.57417	5.62411	5.6198	5.62137	5.52417	5.6325	5.6097
hsa-miR-425-5p	12.1034	12.0487	11.6704	12.1034	11.9111	11.9516	11.863	12.2047	11.5986	11.8416	11.909	11.9168	11.5728	11.804	11.909	12.0375	12.468	11.7438	11.9651	11.6541
hsa-miR-4257	6.05776	5.74426	6.32947	6.07699	5.92991	6.04264	6.21139	6.04451	5.4632	5.975	6.07065	5.96313	6.27272	5.80177	6.41044	5.94968	5.99715	6.00026	6.37239	6.25448
hsa-miR-4270	6.44125	6.35038	6.60026	6.45826	6.75459	6.361	6.50674	6.40929	5.62395	6.18871	6.61343	6.56615	6.2854	6.35197	6.56819	6.36937	5.90034	6.33233	6.72249	7.07264
hsa-miR-4271	5.9614	5.72813	6.07106	5.96545	5.84058	5.98192	5.83348	5.85629	5.75276	5.93625	5.93937	5.80862	6.06582	5.68619	6.10876	5.75582	5.77842	5.89403	5.98046	6.12085
hsa-miR-4281	8.70921	7.19773	8.3237	7.73016	8.62989	8.14629	8.32506	7.65631	7.99119	7.54402	8.44267	7.33495	8.99547	7.09008	8.97819	7.16247	8.0078	7.32506	7.64288	8.09892
hsa-miR-4286	5.68316	5.91796	5.6879	5.58939	5.96054	5.7555	5.60265	5.85605	6.0555	5.67216	5.85271	5.62192	5.4936	5.61891	5.55595	5.923	5.7586	5.63885	5.95228	5.52199
hsa-miR-4298	6.24586	6.28236	6.74025	6.51223	6.29454	6.50814	6.28069	6.30259	5.6317	6.23677	6.49183	6.6061	6.37838	6.32967	6.19884	6.28265	6.12095	6.50833	6.19219	6.75884
hsa-miR-4299	9.91214	9.54646	10.0538	9.10088	9.86998	9.67745	10.0392	9.20137	9.41893	9.7512	9.84672	9.33986	10.1691	8.07791	9.7238	9.00517	9.80007	9.25292	10.1683	9.51771
hsa-miR-4306	11.32	11.99	11.0133	11.8947	11.8386	11.7395	11.4744	11.5439	11.0915	11.8524	12.2517	11.9898	11.1163	12.0653	10.812	12.0908	11.493	12.0333	11.0187	11.8149
hsa-miR-4313	5.5761	5.6733	5.50176	5.56222	5.79874	5.57135	5.5919	5.64439	5.28581	5.53648	5.69406	5.58297	5.56559	5.58528	5.66873	5.55631	5.56261	5.48316	5.60136	5.7023
hsa-miR-4317	5.3619	5.41572	5.25426	5.43139	5.37573	5.34793	5.33548	5.37355	5.20794	5.26578	5.43995	5.44178	5.1783	5.57665	5.23865	5.52566	5.32195	5.49145	5.26796	5.32293
hsa-miR-4318	6.47613	6.24623	6.47486	6.78868	6.37846	6.32176	6.29788	6.32704	6.25781	6.47993	6.82237	6.4973	5.92318	6.6307	6.34167	6.61246	6.4684	6.431	6.11897	6.54809
hsa-miR-4420	5.56116	5.58386	5.72017	5.60977	5.79342	5.53126	5.71233	5.48868	5.34562	5.63995	5.763	5.58497	5.43573	5.56692	5.53663	5.5865	5.65804	5.52765	5.73018	5.65713
hsa-miR-4428	7.04378	6.34758	7.19847	6.83634	6.41721	7.50211	7.17941	6.92375	6.23163	6.87671	6.65275	6.86979	8.3011	6.56826	8.27481	6.47619	6.98185	6.81349	6.5953	7.4708
hsa-miR-4430	6.75056	6.19397	6.81741	6.4827	6.37914	6.56729	6.77041	6.53665	5.42149	6.45816	6.28059	6.27895	7.69366	6.13982	7.64314	6.28594	6.743	6.36154	6.66319	6.89376
hsa-miR-4433a-3p	5.65294	5.53491	5.89575	5.74097	5.79519	5.7876	5.5875	5.70167	5.2634	5.57811	5.78294	5.70868	5.52031	5.62724	5.63043	5.64706	5.52045	5.73923	5.8661	5.94682
hsa-miR-4433a-5p	5.61505	5.70108	5.65131	5.56937	5.81268	5.5671	5.71739	5.67647	5.38934	5.61387	5.67015	5.59626	5.51896	5.5461	5.59297	5.59843	5.64273	5.53656	5.76893	5.64652
hsa-miR-4436b-3p	5.6263	5.64321	5.57298	5.58325	5.54979	5.5477	5.67981	5.4444	6.72776	5.57127	5.82208	5.61397	5.39521	5.43199	5.32385	5.58714	5.68578	5.54928	5.83026	5.41808
hsa-miR-4442	5.8011	5.87212	5.87378	5.88004	5.66028	5.91885	5.83396	5.83846	5.28124	5.79729	5.8788	5.86878	5.85965	5.81814	5.88055	5.81191	5.74312	5.84546	5.64194	5.89595
hsa-miR-4443	6.458	6.6549	6.65898	6.53321	6.33559	6.65117	6.30503	6.64133	6.05963	6.30469	6.4658	6.58748	6.27519	6.57408	6.43333	6.61779	6.35494	6.37005	6.64295	6.8463
hsa-miR-4454	11.084	10.2847	12.4577	10.3553	11.1216	11.0733	11.8268	11.6968	12.5628	10.411	12.4017	10.5006	13.0016	10.6596	12.6956	10.9701	10.9916	10.2621	12.324	10.9711
hsa-miR-4459	10.3301	9.34939	10.6287	9.97565	10.0185	10.558	10.5904	9.8799	9.44908	10.0268	10.2429	9.85821	12.291	8.81565	11.7712	9.47253	10.1006	9.54183	10.5817	10.7696
hsa-miR-4462	5.59561	5.49312	5.76777	5.62088	5.61015	5.69582	5.78228	5.70009	5.28931	5.72503	5.64101	5.53405	5.87462	5.47501	6.01473	5.52301	5.62466	5.65436	5.7595	5.64177
hsa-miR-4463	5.69645	5.58235	5.8939	5.72972	5.69817	5.7788	5.6811	5.78283	5.16069	5.57652	5.70323	5.74152	5.60387	5.63052	5.78469	5.65456	5.63479	5.68268	5.81375	5.92907
hsa-miR-4465	7.20541	6.27064	7.13774	7.06279	6.40579	7.51076	7.21443	6.88376	7.38505	6.98118	7.13321	6.83035	8.93261	6.4112	8.55645	6.59088	7.11792	6.78366	7.2503	7.791
hsa-miR-4466	9.12926	7.65168	9.01753	8.11875	8.60721	8.83257	8.9167	8.40001	8.05855	8.0882	8.60534	7.89615	9.96591	7.37469	9.9817	7.6715	8.57484	7.73905	8.7523	8.70175
hsa-miR-4476	6.0292	5.27515	5.90621	6.09957	5.24934	6.19169	5.96593	5.85892	7.25441	6.15439	6.41892	5.83535	5.75593	5.64167	5.75777	5.94053	6.04987	5.86694	6.64253	5.95116
hsa-miR-4478	5.87887	5.7309	5.90321	5.80348	5.77443	5.91476	5.9291	5.89024	5.31711	5.82324	5.70737	5.75681	6.14703	5.68131	6.52022	5.67788	5.91905	5.81	5.78875	6.0386
hsa-miR-4481	6.60841	6.65236	6.11458	6.14356	6.44752	6.16551	6.74639	6.12178	7.27745	6.61869	6.84695	6.68322	5.82989	5.7339	5.6802	6.23511	6.54933	6.22131	6.88113	6.17469
hsa-miR-4486	6.71366	5.26037	6.52389	6.76227	5.34729	7.08799	6.6587	6.32002	8.1347	6.95828	7.28778	6.35405	6.66644	6.04666	6.23741	6.47879	6.68418	6.36126	7.5541	6.56109
hsa-miR-4497	6.14256	5.84702	6.34958	6.1231	6.00249	6.29882	6.32288	6.14757	5.89637	6.07141	6.18382	6.03917	6.82206	5.8898	6.80931	5.9229	6.14944	5.95917	6.33162	6.49129
hsa-miR-4499	5.9588	5.81193	6.09101	5.92941	5.77713	6.03647	5.92888	5.9765	5.32361	5.89255	6.03469	5.98812	6.09537	5.77243	6.39356	5.88933	5.93786	5.95278	5.924	6.10011
hsa-miR-4505	7.37352	6.48446	7.4066	6.95942	7.30758	7.26139	7.53953	6.95449	6.55735	6.9558	7.30131	6.91295	7.52618	6.55572	7.53998	6.68911	7.08209	6.92188	6.90826	7.12547
hsa-miR-4507	7.33372	6.63629	7.14069	6.88873	7.04884	7.39636	7.37083	6.89709	7.00135	6.85201	7.03365	6.84245	7.59098	6.51082	7.45044	6.70415	6.887	6.88732	7.00745	7.35619
hsa-miR-4515	5.78796	5.66928	5.74277	5.73577	5.75745	5.85812	5.80783	5.69367	7.26393	5.76608	5.78612	5.63022	5.82291	5.63591	5.84291	5.71265	5.74735	5.65528	5.9096	5.6299
hsa-miR-4516	6.11781	5.81963	5.99068	5.78573	6.27522	5.81806	5.90057	5.78454	5.42498	5.75647	5.95939	5.73691	5.87861	6.09515	6.24004	5.65434	5.77822	5.73489	5.82988	5.836
hsa-miR-451a	9.90349	10.4017	9.73514	10.8464	10.4746	10.4394	9.75299	10.1538	10.4099	10.4931	10.5497	10.8721	9.08039	12.4906	9.27749	10.6014	9.85972	11.9136	9.89924	9.86679
hsa-miR-4530	7.6267	6.95421	7.54287	7.09843	7.12423	7.95132	7.63851	7.25729	6.54242	7.12444	6.9743	7.03528	8.30453	6.89256	8.03918	6.87238	7.56383	6.94257	7.2672	7.55009
hsa-miR-4532	5.83111	5.6779	5.79893	5.73626	5.74579	5.75952	5.85075	5.83679	5.28553	5.68054	5.81979	5.71018	5.8237	5.59823	6.12253	5.6589	5.81282	5.69807	5.72516	5.78505
hsa-miR-4534	5.55347	5.53343	6.15893	5.91908	5.50247	5.66295	5.48437	5.66607	5.21124	5.5586	5.94055	5.88546	5.49722	5.58934	5.60967	5.50933	5.42712	5.69919	5.50178	5.73567
hsa-miR-4538	5.50314	5.36971	5.66758	5.62757	5.46676	5.64507	5.68904	5.56196	5.2522	5.51766	5.5738	5.57561	5.62994	5.46288	5.80814	5.51069	5.59297	5.52435	5.53359	5.73514
hsa-miR-4649-3p	5.80188	5.80737	5.74802	5.70097	5.88913	5.5738	5.88575	5.67523	6.35572	5.75673	5.95231	5.77186	5.55159	5.5251	5.5717	5.67815	5.84533	5.67699	6.04598	5.66461
hsa-miR-4653-3p	6.24513	5.97161	6.63893	6.2205	5.93595	6.25252	6.47111	6.27318	5.44941	6.1936	6.23932	6.11568	7.24032	5.95863	7.1634	6.01612	6.32601	6.18172	6.47819	6.48799
hsa-miR-4656	5.77808	5.62189	5.82558	5.75065	5.57948	5.87994	5.8011	5.7939	5.26379	5.67803	5.65035	5.7008	5.99857	5.55917	6.18139	5.59245	5.7565	5.62498	5.65346	5.85095
hsa-miR-4665-3p	7.78334	6.7253	6.74652	6.57218	7.45742	6.29959	6.88914	6.39129	7.59813	7.02575	7.95543	6.58133	7.35802	6.16172	7.2409	6.28285	6.98601	6.50628	6.83566	6.53958
hsa-miR-4668-5p	5.68741	5.4153	5.78294	5.51924	5.34892	5.43888	5.47892	5.51076	6.43992	5.54113	5.61511	5.69562	5.37248	5.54103	5.398	5.557	5.47804	5.56097	6.09249	5.49953
hsa-miR-4669	6.32798	6.1375	6.41497	6.28617	6.26973	6.3865	6.35029	6.263	5.55862	6.19265	6.22156	6.3175	6.88926	6.12537	6.88855	6.12682	6.1718	6.33327	6.17999	6.68004
hsa-miR-4672	6.88082	6.49421	6.69923	6.46936	6.49563	6.78143	6.88534	6.67855	5.93572	6.62672	6.53494	6.55767	8.08969	6.27923	7.8376	6.45537	6.80916	6.53725	6.56102	7.32858
hsa-miR-4687-3p	7.47988	6.86608	7.03447	6.78134	7.43547	7.04669	7.07544	6.79814	6.77415	6.61746	7.20543	6.64107	7.4342	6.37963	7.54028	6.5691	7.09113	6.55344	7.07882	7.08591
hsa-miR-4690-5p	5.65776	5.46313	5.76074	5.65054	5.54512	5.6974	5.64648	5.55261	5.38081	5.61627	5.72456	5.59287	5.58563	5.55304	5.71212	5.51142	5.60369	5.57484	5.6188	5.65639
hsa-miR-4695-5p	5.58568	5.4356	5.61335	5.58363	5.50131	5.57021	5.61198	5.57484	5.27954	5.49621	5.52145	5.58233	5.56964	5.55516	5.63164	5.44846	5.51069	5.4826	5.45939	5.64214
hsa-miR-4707-5p	5.66393	5.52711	5.49223	5.63927	5.49505	5.53734	5.62539	5.53752	6.01452	5.59959	5.80659	5.6501	5.41383	5.47978	5.36946	5.47935	5.62249	5.65549	5.81661	5.57267
hsa-miR-4710	7.1458	7.53056	6.73632	6.91202	7.14783	7.45033	7.80762	6.84054	8.54787	7.52	8.09146	7.82678	6.85131	6.48845	6.37283	6.99101	7.4941	6.91762	7.60873	7.31692
hsa-miR-4721	7.11279	6.47072	7.48536	7.00037	6.82118	7.47129	7.18003	6.77263	6.99671	6.9243	7.02782	6.8141	8.11684	6.47436	7.82204	6.65708	6.93964	6.78287	7.3074	7.47807
hsa-miR-4725-5p	5.57323	5.63874	5.59657	5.57176	5.68362	5.53159	5.61713	5.51973	5.46763	5.59273	5.6185	5.52078	5.48858	5.5044	5.56603	5.53227	5.62177	5.47909	5.55572	5.54304
hsa-miR-4727-3p	5.74872	5.92105	5.68856	5.85821	5.66966	5.57137	5.80921	5.71476	5.20037	5.87164	5.76349	5.79894	5.46904	5.79711	5.74085	5.80507	5.86691	5.90244	5.53494	5.83468
hsa-miR-4728-5p	6.34023	6.10836	6.46551	6.29228	6.16439	6.71177	6.41642	6.19125	5.59169	6.32754	6.25239	6.26343	6.91553	6.03673	6.9432	6.1101	6.38473	6.23094	6.18898	6.69664
hsa-miR-4739	5.93471	5.48235	5.52807	5.52827	5.74429	5.49612	5.71555	5.52457	5.20354	5.47458	5.65437	5.37467	5.48402	5.5053	5.77841	5.46527	5.63929	5.38741	5.37018	5.45768
hsa-miR-4741	6.39171	6.13447	6.3575	6.23885	6.07271	6.23363	6.1573	6.23601	6.34866	6.13117	6.12637	6.06899	6.68551	5.89933	6.88048	6.02523	6.15854	6.16992	6.09219	6.2822
hsa-miR-4746-3p	5.87573	5.76929	5.95764	5.85847	5.86662	5.90463	5.96312	5.78478	5.6837	5.81622	5.84475	5.75845	6.16187	5.6558	6.26862	5.75063	5.85488	5.73904	5.88039	5.9278
hsa-miR-4758-5p	5.74501	5.52339	5.5977	5.5602	5.43112	5.67829	5.57565	5.58792	5.51644	5.57866	5.53635	5.53758	5.71615	5.47681	5.81267	5.5209	5.57794	5.54267	5.41184	5.65841
hsa-miR-4763-3p	6.76606	5.99833	6.26642	6.1642	6.28853	6.0819	6.18365	6.12161	6.94681	6.21271	6.17888	6.07094	6.45632	5.93135	6.56184	6.11675	6.0281	6.1021	6.2354	6.31242
hsa-miR-4767	5.74902	5.43342	5.61482	5.56875	5.63098	5.55336	5.61928	5.55725	5.48701	5.59639	5.75696	5.49698	5.56585	5.5023	5.86232	5.39697	5.61509	5.47202	5.57533	5.62832
hsa-miR-4774-3p	5.73052	5.86702	5.5952	5.64784	5.72208	5.4844	5.90513	5.62243	5.53682	5.8425	6.14265	5.84072	5.34815	5.31243	5.20772	5.6333	5.88104	5.69422	6.04948	5.5554
hsa-miR-4784	5.73949	5.73299	5.76287	5.63771	5.77165	5.62711	5.84125	5.78831	5.32578	5.6986	5.82906	5.69745	5.59606	5.61084	5.73698	5.66505	5.78522	5.71848	5.65798	5.7652
hsa-miR-4787-3p	5.91186	5.63533	5.79442	5.68235	5.91969	5.65478	5.87337	5.71526	5.78406	5.65443	5.79434	5.62185	5.7858	5.54716	6.08466	5.65785	5.79423	5.55956	5.78886	5.75245
hsa-miR-4787-5p	5.59151	5.54401	5.69602	5.66058	5.51747	5.7153	5.60686	5.59601	5.39323	5.62585	5.51504	5.56688	5.8883	5.52273	5.80879	5.47038	5.57219	5.57256	5.61275	5.68169
hsa-miR-4788	6.17761	6.3974	6.50992	6.39286	6.00465	6.06896	6.12092	6.24187	5.48384	6.15522	6.25365	6.22839	5.99452	6.19617	6.2781	6.18657	6.07116	5.93282	5.99264	6.13382
hsa-miR-4793-5p	5.47057	5.7503	5.6421	5.68788	5.32029	5.75238	5.49111	5.72543	5.2504	5.55223	5.52924	5.6785	5.60983	5.64029	5.52407	5.72923	5.45201	5.69693	5.44637	5.77366
hsa-miR-4800-5p	5.47069	5.43179	5.66932	5.65596	5.45338	5.6712	5.46344	5.5823	5.24913	5.48964	5.59698	5.61018	5.59479	5.60193	5.49933	5.47317	5.47249	5.69643	5.37973	5.73492
hsa-miR-483-5p	5.4234	5.61769	5.61614	5.70107	5.52266	5.72501	5.63206	5.58639	5.13	5.62974	5.65241	5.63712	5.59891	5.59294	5.57787	5.47719	5.54094	5.62112	5.44887	5.71005
hsa-miR-484	7.73779	7.56462	7.87297	7.70881	7.47089	7.80134	7.50468	7.92033	7.26205	7.59763	7.76794	7.22274	8.18457	7.37492	7.89621	7.85763	8.16502	7.2773	7.34433	7.23662
hsa-miR-486-5p	18.5382	18.5382	18.5382	18.5382	18.4932	18.5448	18.5448	18.5382	18.5382	18.5249	18.541	18.5382	18.5249	18.5382	18.5382	18.5382	18.5382	18.5382	18.5382	18.5382
hsa-miR-491-5p	5.32583	5.5602	5.36565	5.47395	5.53317	5.40698	5.48249	5.52319	5.49334	5.33898	5.46631	5.4265	5.3496	5.41788	5.48263	5.52738	5.5513	5.29261	5.42709	5.35162
hsa-miR-494-3p	10.3394	9.39123	10.5271	10.2146	9.66475	11.4824	10.4224	10.1206	8.99512	10.0948	9.71713	9.80813	12.9275	9.25094	12.4358	9.43616	10.1653	9.76208	10.3607	11.2084
hsa-miR-5006-5p	6.45868	6.138	6.5115	6.24426	6.13593	6.52703	6.53535	6.1589	5.4588	6.27022	6.25569	6.19531	7.19163	6.05828	7.03874	6.11233	6.43162	6.29987	6.21642	6.52813
hsa-miR-500a-3p	5.41752	5.46554	5.46304	5.64368	5.3695	5.47191	5.3662	5.3925	5.28609	5.43564	5.51473	5.47823	5.35342	5.66337	5.44982	5.66235	5.52289	5.55212	5.4016	5.41236
hsa-miR-504-3p	5.6976	5.67929	5.68042	5.57737	5.73668	5.67114	5.65784	5.69801	5.61643	5.52469	5.90198	5.61232	5.59966	5.53252	5.6854	5.69122	5.92144	5.55574	5.94842	5.70934
hsa-miR-505-3p	9.60561	10.068	9.65589	9.8338	10.4092	9.80228	9.56509	9.74525	9.05947	10.4651	9.85341	9.60633	9.40736	9.30631	9.59836	9.91782	9.95288	9.45911	10.3108	9.92432
hsa-miR-505-5p	7.23858	7.83853	7.00104	7.67347	7.4574	7.14992	7.23513	7.50897	6.42999	7.64172	7.16352	7.69901	6.35741	7.55855	6.72025	7.79629	7.65631	7.72728	6.88258	7.67375
hsa-miR-5100	6.59921	6.53165	6.52643	6.34181	7.0117	6.75847	6.89888	7.07771	6.61774	6.40579	7.16773	6.31665	6.60822	6.45186	6.54285	6.61157	6.73999	6.40731	6.87457	6.63198
hsa-miR-513a-5p	6.25773	6.01853	6.37936	6.13152	5.99684	6.431	6.38901	5.99939	5.39184	6.21539	6.08634	6.08035	6.64387	6.04326	6.77198	5.96076	6.2421	6.18371	6.14523	6.268
hsa-miR-513b-3p	5.66873	5.43909	5.79769	5.7235	5.49189	5.72275	5.69875	5.50086	5.19386	5.61837	5.62322	5.56042	5.68786	5.52966	5.82182	5.45422	5.73065	5.66661	5.54457	5.71462
hsa-miR-513c-5p	5.41946	5.30438	5.50572	5.42477	5.22573	5.46226	5.48361	5.40178	5.15514	5.3781	5.4091	5.43766	5.43185	5.29944	5.47528	5.33629	5.4089	5.44451	5.23792	5.42736
hsa-miR-532-3p	7.01258	6.86845	7.07164	7.13976	6.83885	6.87851	6.7542	6.90846	6.489	6.95852	6.97538	6.74889	6.92538	6.71585	7.24274	7.16068	7.80842	6.97702	6.77773	6.76869
hsa-miR-548c-3p	5.34468	5.27967	5.25461	5.36196	5.16888	5.29739	5.21166	5.2488	5.23459	5.18133	5.22232	5.24698	5.3079	5.27538	5.12716	5.26183	5.23141	5.26195	5.25611	5.24026
hsa-miR-564	5.76245	5.70809	5.78472	5.72087	5.64712	5.70093	5.8744	5.86982	5.30251	5.72145	5.77662	5.69689	5.5662	5.61391	5.83652	5.68662	5.9224	5.62522	5.65521	5.69726
hsa-miR-574-3p	6.10912	6.25491	5.90894	5.96079	5.9968	6.02687	5.98205	6.24859	6.71014	5.87669	5.98255	5.97377	5.88799	5.79134	6.20855	6.28112	6.16512	6.09413	6.15297	6.06031
hsa-miR-574-5p	5.91028	6.03521	6.02202	5.92062	5.97478	6.09863	6.02381	5.94887	6.85154	5.82169	5.95357	5.93275	5.93815	5.90877	5.84107	5.94645	5.87933	6.0033	6.07107	6.1268
hsa-miR-575	5.80267	5.81549	5.90787	5.74234	5.76749	6.08703	5.92461	5.85793	5.35322	5.77169	5.72328	5.7812	5.90349	5.80077	6.15895	5.79378	5.88373	5.80857	5.76849	5.83605
hsa-miR-584-5p	5.52026	5.51232	5.65195	5.54177	5.68592	5.59951	5.62677	5.5124	5.44147	5.61993	5.68722	5.57936	5.41725	5.52366	5.63526	5.56028	5.64139	5.56657	5.55371	5.58524
hsa-miR-628-3p	5.29661	5.50079	5.248	5.43977	5.43587	5.37917	5.2774	5.25811	4.95044	5.17568	5.34271	5.43776	5.20221	5.63285	5.28688	5.44563	5.34293	5.43888	5.31544	5.40468
hsa-miR-638	5.84225	5.5976	6.26087	6.04315	5.94613	6.03157	6.03174	5.9474	5.54996	5.89934	5.96997	5.87192	6.24697	5.74368	6.37713	5.75909	5.85409	5.7637	6.30109	6.29168
hsa-miR-640	5.90838	5.77417	5.71769	5.67219	5.86719	5.4289	6.00508	5.53659	5.89414	5.8399	6.12442	5.86511	5.36691	5.40367	5.39846	5.65472	5.95892	5.66789	5.82078	5.49523
hsa-miR-642a-3p	8.05505	7.0153	8.62228	7.90552	7.7367	8.35363	8.1917	7.89758	7.22824	7.88097	7.91719	7.64868	9.57669	7.33185	9.70608	7.52367	7.99949	7.33378	7.79505	8.7125
hsa-miR-642b-3p	6.20819	5.9549	6.42182	6.23578	6.16182	6.34981	6.36134	6.30897	5.41892	6.21621	6.09882	6.13138	7.19798	5.98863	7.32666	6.15801	6.12944	6.08765	6.43339	6.76271
hsa-miR-650	5.19166	5.17652	5.17421	5.205	5.31888	5.2671	5.2253	5.23014	5.06913	5.20105	5.17437	5.22425	5.24001	5.27169	5.19204	5.21502	5.25683	5.18969	5.13154	5.20719
hsa-miR-652-3p	7.25917	7.62197	7.77405	7.65935	7.35014	7.42977	7.33719	7.76532	6.9149	7.51034	7.78431	7.6699	7.07193	7.64148	7.44498	7.74588	7.60543	7.60482	7.39771	7.49887
hsa-miR-652-5p	5.40013	5.2053	5.47598	5.45505	5.38854	5.45708	5.43546	5.40554	5.1281	5.3094	5.39725	5.4131	5.36188	5.38636	5.53027	5.23244	5.42181	5.38605	5.39108	5.40841
hsa-miR-665	5.86012	5.90653	6.2327	5.9691	5.86096	6.07262	6.18446	6.31753	5.65862	5.92197	6.05355	5.95952	6.33015	5.91294	6.22097	5.96989	6.36432	5.94148	6.19421	5.93419
hsa-miR-671-3p	5.38802	5.24167	5.26636	5.30224	5.39063	5.29789	5.45711	5.31504	5.24263	5.39839	5.38573	5.3591	5.4139	5.26039	5.34489	5.30861	5.40396	5.22287	5.22028	5.38632
hsa-miR-671-5p	5.71032	5.59891	5.69723	5.74844	5.75333	5.79774	5.72664	5.71315	5.38513	5.76455	5.73827	5.67835	5.67954	5.66678	5.74522	5.64513	5.67227	5.7408	5.77933	5.76966
hsa-miR-7-1-3p	5.24071	5.34574	5.23484	5.59303	5.3201	5.44366	5.2871	5.48538	5.21851	5.33573	5.27815	5.39929	5.17691	5.76568	5.33071	5.62228	5.38787	5.52236	5.2611	5.30723
hsa-miR-7-5p	5.76725	6.27777	5.73304	6.60987	5.85466	6.26091	5.60987	6.19243	5.222	6.10007	5.80146	6.67546	5.27629	7.99479	5.64482	6.86207	5.75295	7.31259	5.47736	6.41398
hsa-miR-720_v18.0	6.31692	6.28285	6.56173	5.89062	6.55497	6.17046	6.37175	6.23287	7.14974	6.0615	7.34667	5.9494	6.77239	6.00688	6.32884	6.13748	6.07432	5.90411	6.93383	5.95716
hsa-miR-744-5p	5.64407	6.01354	5.91147	5.9266	5.82113	5.73816	5.78603	5.94152	5.19343	5.77615	5.6918	5.8368	5.38415	5.94928	5.57902	5.94765	5.72322	5.96869	5.74916	5.87571
hsa-miR-760	5.85152	5.61734	6.17434	5.99582	6.04979	5.94563	5.86104	5.94297	5.42072	5.74922	5.96786	5.84115	5.98207	5.79749	6.24824	5.72276	5.71301	5.77665	6.20319	6.2154
hsa-miR-762	6.79797	6.25424	6.62055	6.30832	6.57401	6.56872	6.86553	6.44946	6.3098	6.48902	6.63073	6.24813	7.29367	6.13617	7.35729	6.18956	6.69528	6.21743	6.76333	6.69706
hsa-miR-765	5.45611	5.38661	5.61128	5.57141	5.38891	5.6413	5.31621	5.42627	5.08142	5.48724	5.54784	5.55265	5.41901	5.5038	5.39636	5.41097	5.3496	5.49218	5.25566	5.58733
hsa-miR-92a-3p	16.1567	15.4482	16.1864	16.1462	16.2516	15.1612	16.1105	15.6007	16.113	15.5896	16.2793	15.3671	16.0272	15.4801	15.9133	15.566	16.3038	15.667	16.1259	15.6523
hsa-miR-93-3p	6.15287	6.2099	5.78212	6.23561	6.07608	6.31489	6.11447	6.25394	5.48379	6.11683	6.00144	6.12925	5.64819	6.18158	6.15873	6.32951	6.31451	6.24891	5.73498	6.11899
hsa-miR-93-5p	8.57732	9.14452	9.13896	9.67524	8.03839	9.53435	8.08738	9.45121	7.05326	9.14236	7.88881	9.41438	7.49654	10.1643	9.14597	9.86115	8.33362	9.98689	7.52272	9.34693
hsa-miR-939-5p	5.87448	6.02049	5.79277	5.76454	6.10163	5.75461	5.92366	5.83945	5.42157	5.87669	5.9422	5.81712	5.766	5.69622	5.83753	5.83801	5.82432	5.75873	5.989	5.88196
hsa-miR-98-3p	5.72595	5.71048	5.62079	6.02197	5.53049	5.57361	5.43243	5.73841	5.16956	5.68851	5.46315	5.9264	5.29791	6.19631	5.52922	5.85327	5.54327	5.94101	5.34113	5.79404
hsa-miR-99a-3p	5.30542	5.29163	5.19473	5.50436	5.27874	5.27668	5.3097	5.40324	5.2611	5.27418	5.34019	5.41739	5.16295	5.64571	5.22811	5.41011	5.29493	5.26081	5.22086	5.22778
new-eca-mir-058	5.6437	5.53581	5.50007	5.52418	5.4249	5.56773	5.57295	5.43543	5.39408	5.5058	5.71003	5.55657	5.34123	5.44629	5.34234	5.47613	5.56605	5.4969	5.52452	5.4974
new-eca-mir-059	6.33396	6.65055	6.00902	6.09708	6.54108	5.88053	6.74496	6.02932	7.41638	6.49817	6.80764	6.53595	5.64858	5.61772	5.51427	6.25294	6.56313	6.16233	6.96886	6.00091
new-eca-mir-086	6.11794	6.38928	6.02125	5.94892	5.8318	6.29966	6.2319	5.88942	6.28614	6.00445	6.03575	6.19556	5.81889	5.9891	6.53526	6.31391	6.21926	6.27807	5.94344	5.82505
new-eca-mir-1015	9.20867	8.20721	9.40808	8.69841	8.68888	9.61002	9.34983	9.02465	8.36982	9.1432	8.97974	8.80104	11.3215	8.01886	10.8498	8.55848	9.12355	8.51926	9.60938	9.73492
new-eca-mir-1018_as	7.18316	7.39748	7.1884	6.83131	7.05634	7.67407	7.3605	7.22262	7.05203	7.21757	7.23201	7.02202	8.11677	6.6624	7.96817	6.92026	7.37217	6.88445	7.22212	7.28619
new-eca-mir-1024	5.94971	6.1804	5.71893	5.79984	5.9009	5.6884	6.17807	5.7719	5.91604	6.06634	6.32118	6.08071	5.39451	5.4748	5.31635	5.85669	6.01515	5.85693	6.13942	5.7338
eca-let-7a	9.38107	9.54378	8.95393	10.3731	9.02184	8.8264	8.40295	9.0883	7.24827	9.76414	8.33423	10.0549	7.0148	10.3293	8.4803	9.86532	8.68754	9.73174	8.01938	9.68761
new-eca-mir-1045	5.55298	5.57625	5.68021	5.5864	5.48139	5.56782	5.71472	5.70336	5.21157	5.60436	5.62576	5.58678	5.51052	5.52733	5.68934	5.58137	5.80357	5.56434	5.54576	5.60427
new-eca-mir-1062	5.93966	5.65662	5.90833	5.93297	5.91476	6.87057	5.89336	5.7808	5.68996	5.89986	5.84316	5.80096	6.81008	5.90042	6.28659	5.77452	5.74542	5.91614	6.06258	6.0021
eca-miR-151-5p	5.83748	6.26346	5.89176	5.95723	5.76216	6.09344	5.82328	6.1361	5.32616	5.99329	5.79868	5.9303	5.60299	6.24875	5.63996	6.36076	5.88312	6.02246	5.74327	5.79628
new-eca-mir-131	5.64815	5.45128	5.65593	5.63687	5.32483	5.80338	5.60094	5.65687	5.14236	5.51537	5.50775	5.56042	5.76993	5.44439	6.18488	5.43278	5.63301	5.57127	5.35174	5.78011
new-eca-mir-187	6.12533	5.7995	6.07426	5.93803	5.81202	6.09885	6.12139	6.01745	5.34153	6.00715	5.87253	5.91335	6.87497	5.79636	6.91365	5.8734	6.06091	5.97518	6.02714	6.27031
eca-miR-345-5p	6.6146	5.96144	6.6636	6.1848	6.34509	6.94659	6.61373	6.13455	5.59981	6.27421	6.84082	6.11488	6.56195	6.24425	6.46955	5.96948	6.70017	6.20526	6.38043	6.14056
new-eca-mir-224	8.66196	8.85947	9.19013	8.70102	7.62697	8.74293	8.44406	9.3334	9.02256	8.74784	9.16958	9.09161	9.39471	8.84534	8.36188	8.7552	8.53501	8.45106	9.42604	9.09711
new-eca-mir-245	5.77032	5.99076	5.90751	5.87338	5.58547	6.07821	5.90938	6.05611	5.42657	5.88275	5.79155	5.82083	5.8631	5.74959	6.3525	5.96365	6.0109	5.8235	6.00996	5.89517
new-eca-mir-258	5.68418	5.4356	5.6715	5.70678	5.42872	6.30953	5.67587	5.55243	5.34865	5.56446	5.67684	5.59041	6.28799	5.61319	5.96932	5.51988	5.65586	5.56632	5.66129	5.60802
Novel_00530	6.0876	6.21936	6.41025	6.30951	6.42748	6.8778	6.16145	6.54596	5.42172	5.94702	6.14544	6.10013	6.45742	6.33411	6.79231	6.55312	6.70619	6.30317	6.68495	6.43022
eca-miR-9036	5.80709	5.92475	6.12759	5.93991	6.28302	5.79974	6.05368	5.84218	5.81385	5.98594	6.11396	5.78419	5.71461	5.7407	5.85876	5.87176	6.09922	5.82317	6.1712	5.86979
new-eca-mir-275	5.59265	5.71754	5.93889	5.84875	5.59504	5.77778	5.63303	5.71752	5.22402	5.63166	5.78661	5.83254	5.60258	5.73698	5.58536	5.68939	5.52509	5.83881	5.49056	5.86727
new-eca-mir-290	5.79739	5.60621	5.62754	5.67603	5.57992	5.41202	5.82853	5.43956	5.37542	5.72908	6.01918	5.63878	5.44146	5.35169	5.3563	5.51779	5.78876	5.63156	5.74661	5.50917
new-eca-mir-317	6.22111	5.80945	6.29278	6.09291	5.78187	6.46673	6.23185	6.10267	5.24886	6.10664	5.93484	5.99468	6.68706	5.84526	6.66524	5.8884	6.12853	6.05229	5.99037	6.23744
new-eca-mir-332_as	6.00637	6.19425	5.95746	5.96961	6.32823	5.97572	6.11425	6.05652	5.59363	6.19086	6.05946	5.93295	5.94336	5.79168	5.98044	6.00483	6.07085	6.0204	6.21236	5.98072
new-eca-mir-337	5.59767	5.49852	5.68343	5.63474	5.39878	5.59125	5.66937	5.62737	5.21149	5.5516	5.58422	5.54583	5.53367	5.48107	5.81629	5.4658	5.64445	5.62172	5.48661	5.63373
new-eca-mir-348	6.82319	7.00565	6.57251	6.60542	6.77201	6.76114	7.0436	6.83625	6.22401	6.60951	6.65576	6.78204	6.42886	6.59596	6.52937	6.80272	6.67026	6.81007	6.52049	6.55684
new-eca-mir-391_as	5.42845	5.28684	5.39102	5.37774	5.34815	5.47054	5.35614	5.32587	5.19407	5.34521	5.37049	5.39293	5.44964	5.35034	5.83144	5.4209	5.49262	5.41207	5.32071	5.46473
new-eca-mir-409_as	6.22115	6.64645	5.92903	5.98704	6.43668	5.76479	6.64239	5.94514	6.92576	6.48382	6.85212	6.47658	5.6147	5.54466	5.38854	6.15923	6.47368	6.07726	6.91031	5.91145
new-eca-mir-416	7.11464	6.53439	6.87795	6.68547	6.84288	7.1105	7.30444	6.84693	6.82091	6.73006	6.91002	6.65522	7.46822	6.39238	7.42051	6.57226	6.84203	6.6956	6.8206	7.09453
new-eca-mir-443	14.6922	13.8993	14.8337	14.1846	14.7038	15.4369	14.5863	13.7922	14.4675	14.3206	14.0761	13.7181	15.3039	13.543	14.3877	13.4343	14.251	13.8177	14.6587	14.0187
new-eca-mir-508_as	5.66807	5.76631	5.56504	5.60548	5.78242	5.62413	5.63791	5.6674	5.34628	5.60904	5.59242	5.57739	5.54333	5.5419	5.60297	5.59178	5.61305	5.505	5.68467	5.66593
new-eca-mir-517	6.43512	6.1738	6.41273	6.13576	6.20563	6.78129	6.46762	6.29088	5.42149	6.31208	6.07035	6.16161	7.00269	6.18678	7.14352	6.22578	6.37646	6.22178	6.34807	6.54646
eca-miR-486-5p	6.09745	6.04957	6.35957	6.14771	6.33927	6.32517	6.19414	6.05063	6.15096	6.17819	6.30032	6.01591	6.41652	5.93948	6.43247	6.08612	6.52981	6.00622	6.27814	6.36231
new-eca-mir-529	5.42531	5.38069	5.51216	5.53255	5.42637	5.49589	5.51112	5.54679	5.1234	5.52191	5.40784	5.43372	5.42354	5.38081	5.62021	5.38168	5.50169	5.45219	5.40846	5.52798
new-eca-mir-572	5.86834	5.94259	5.86953	5.79974	6.0021	5.86363	5.98301	5.89061	5.50581	5.85651	5.85033	5.80573	6.14464	5.75528	6.34352	5.84095	5.90437	5.80962	5.99123	5.98595
new-eca-mir-573	5.49969	5.28859	5.46109	5.59993	5.20637	5.64498	5.49268	5.4675	6.02974	5.65988	5.73686	5.45516	5.33734	5.40679	5.35289	5.49408	5.53002	5.46153	5.79977	5.47633
new-eca-mir-598	6.44789	6.0879	6.57681	6.2639	6.31569	6.5398	6.53736	6.27018	5.82719	6.28513	6.42479	6.30605	6.54642	5.96538	6.69817	6.12139	6.37106	6.24931	6.43697	6.57722
new-eca-mir-630	6.31245	5.92357	6.48113	6.31007	6.01648	6.56754	6.47258	6.29736	6.66007	6.35993	6.40775	6.18682	7.36567	6.06823	7.29186	6.28788	6.29801	6.29037	6.63905	6.66417
new-eca-mir-655_as	5.67313	5.56598	5.59446	5.51724	5.66557	5.61717	5.66364	5.5815	5.34117	5.60382	5.5702	5.5871	5.42964	5.42302	5.61902	5.47558	5.57591	5.52459	5.62998	5.50847
new-eca-mir-666_as	5.94488	5.88462	6.20622	6.00956	5.90957	6.07077	6.12174	6.08912	5.38779	5.95099	6.00142	5.98905	6.5232	5.83143	6.51303	5.92908	5.92924	5.89163	6.19316	6.25653
new-eca-mir-714	6.41429	7.01771	6.09384	6.19466	6.79711	6.04026	6.96818	6.18912	7.54861	6.83767	7.16478	6.8425	5.67103	5.69461	5.48668	6.45168	6.77583	6.31233	7.28979	6.18648
new-eca-mir-764_as	5.56894	5.57267	5.4648	5.48559	5.45494	5.41568	5.55657	5.35881	5.24931	5.51673	5.74507	5.59389	5.31467	5.34323	5.21811	5.40655	5.54223	5.53105	5.41598	5.4963
new-eca-mir-777_as	10.7672	9.4015	10.118	10.0094	9.84756	9.1238	10.7674	9.66195	9.32732	10.3366	9.94192	10.0931	10.9986	9.43775	11.0203	9.27651	10.9311	10.0235	10.0023	10.3519
new-eca-mir-809	6.09018	6.3348	5.85091	5.92363	6.29631	5.70427	6.44424	5.81735	6.43236	6.26302	6.61159	6.23029	5.43366	5.48247	5.37833	5.91385	6.3425	5.91924	6.49913	5.75565
new-eca-mir-835	5.71857	5.66374	5.59153	5.54024	5.66651	5.47551	5.77721	5.54711	5.71038	5.60995	5.85326	5.70108	5.38368	5.46957	5.46157	5.53449	5.74373	5.59863	5.78535	5.50679
new-eca-mir-846	6.30262	5.7696	5.91864	5.96333	5.80199	5.57207	6.21915	5.91063	5.30212	6.03367	5.83054	5.96943	5.77708	5.99245	6.22032	5.72242	6.35841	6.11924	5.54549	5.95567
new-eca-mir-847	5.30221	5.35385	5.28672	5.33964	5.20961	5.42028	5.302	5.50299	5.15964	5.25883	5.3549	5.43202	5.26708	5.62546	5.35847	5.54717	5.29087	5.46455	5.24854	5.32349
eca-miR-197	7.42465	7.39805	7.84242	7.29507	7.69204	7.46872	7.52799	7.37499	7.19199	7.57473	7.74245	7.3712	7.62832	6.90902	7.68558	7.20862	7.65394	7.40946	7.95909	7.56104
new-eca-mir-878	6.2174	6.03818	6.28405	6.15223	6.00149	6.40977	6.39534	6.24467	6.57248	6.25922	6.22698	6.10031	7.267	5.96427	7.22905	6.11831	6.34592	6.11224	6.39771	6.56174
new-eca-mir-918	5.7209	5.79296	5.63574	5.64568	5.54385	5.70665	5.58788	5.77604	5.9595	5.6169	5.66859	5.65778	5.49588	5.50399	5.63204	5.79983	5.63801	5.70873	5.7354	5.69705
eca-miR-26a	5.65145	5.772	5.51415	5.93286	5.54604	5.6002	5.67038	5.72885	5.09812	5.5917	5.65825	5.62478	5.37482	6.1114	5.53574	5.84747	5.6721	5.8292	5.29481	5.60663
eca-miR-378	5.99058	5.94873	5.75158	5.78614	5.88487	5.79176	5.89385	5.83574	5.27524	5.74788	5.72828	5.72037	5.62661	5.85374	6.12263	6.06557	6.08019	6.06993	5.71124	5.82504
new-eca-mir-974	5.77237	5.83112	5.71806	5.68282	5.92827	5.65039	5.81231	5.74791	5.32611	5.68687	5.79927	5.66292	5.60513	5.58877	5.73225	5.65125	5.75667	5.58563	5.80553	5.77102
new-eca-mir-983	6.00074	6.13221	5.6979	5.74735	5.9401	5.57972	6.18021	5.70501	5.95874	6.10521	6.31405	6.05666	5.46049	5.43346	5.35467	5.87623	6.11728	5.82636	6.16133	5.64248
new-eca-mir-995	13.1132	11.5153	13.6407	12.6665	12.4899	13.907	13.1003	12.4071	12.4595	12.5805	12.4295	12.3617	14.3773	12.0174	13.7732	11.7318	12.6454	12.1917	13.6148	13.2109
new-eca-mitomir-002	8.42309	7.69351	6.68536	7.80109	7.7572	7.41459	8.32129	7.04318	6.77034	7.95108	7.08172	7.66566	6.77799	7.91643	7.72046	7.17657	8.23925	7.85274	6.43725	7.78414
new-eca-mitomir-009	5.80923	5.90251	5.79724	5.71506	6.03565	5.72744	5.85237	5.78271	5.33455	5.7834	5.84732	5.72048	5.69084	5.66961	5.78045	5.78512	5.79764	5.65198	5.83699	5.80005
new-eca-mitomir-010	6.36891	5.85104	6.17086	6.04772	6.10585	6.00694	6.14542	5.96592	5.65958	5.96685	6.16037	5.91316	5.996	5.85881	6.56687	5.91065	6.05509	5.9106	5.9416	6.05482
new-eca-mitomir-015	5.61364	5.62186	5.96372	5.75068	5.46361	5.64643	6.01078	5.89973	5.20495	5.52518	5.72426	5.75781	5.61155	5.75207	5.77967	5.89075	6.21375	5.83792	5.63853	5.66343
new-eca-mitomir-016	5.13757	5.25502	10.2991	9.19775	5.24319	5.16225	10.2728	9.9835	5.13843	5.12526	9.6412	9.42041	10.2763	8.81199	9.93835	9.6987	10.6937	9.43257	9.91074	9.42155
new-eca-mitomir-018	5.42163	5.65929	5.16511	5.26038	5.49165	5.51634	5.2287	5.20977	5.46482	5.31677	5.25446	5.15121	5.35147	5.49497	5.21913	5.23908	5.42864	5.44809	5.33717	5.22774
